# Supplementary material
Source: Springer Nature journal article supplement (https://www.springermedizin.de/resource/supplementary/12935_2011_317_MOESM2_ESM.pdf/9540298)

**A**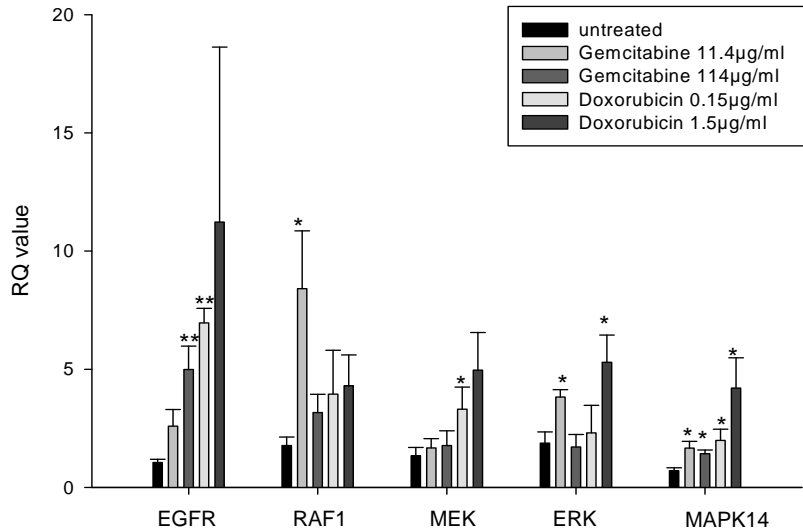**B**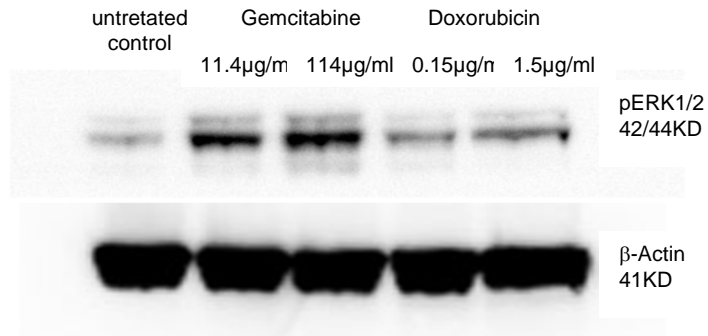

Supplement: MOESM2 [file 9540298]
